1 **Comparison of cardiovascular and renal outcomes between dapagliflozin**  
2 **and empagliflozin in patients with type 2 diabetes**

3

4 Jayoung Lim<sup>1</sup>, In-Chang Hwang<sup>1,2\*</sup>, Hong-Mi Choi<sup>1,2</sup>, Yeonyee E. Yoon<sup>1,2</sup>, Goo-Yeong Cho<sup>1,2</sup>

5

6 <sup>1</sup>Department of Cardiology, Cardiovascular Center, Seoul National University Bundang  
7 Hospital, Seongnam, Gyeonggi, South Korea;

8 <sup>2</sup>Department of Internal Medicine, Seoul National University College of Medicine, Seoul,  
9 South Korea;

10

11 \* Corresponding author

12 E-mail: [inchang.hwang@gmail.com](mailto:inchang.hwang@gmail.com)

13

14 **Short title:** Dapagliflozin vs. empagliflozin in type 2 diabetes

## 16 Abstract

17 **Background:** The cardiovascular and renal benefits of sodium glucose co-transporter 2  
18 inhibitors (SGLT2i) have been clearly demonstrated. However, studies comparing the effects  
19 of dapagliflozin and empagliflozin are scarce. Therefore, we aimed to compare the clinical  
20 outcomes between dapagliflozin and empagliflozin in patients with type 2 diabetes without  
21 prior atherosclerotic cardiovascular disease, chronic kidney disease, or heart failure.

22 **Methods:** Using a propensity-score matching method, we retrospectively analyzed 921  
23 patients treated with dapagliflozin, 921 patients treated with empagliflozin, and 1842 patients  
24 treated with dipeptidyl peptidase-4 inhibitors (DPP4i; control group). Study outcomes  
25 comprised composite coronary events (acute coronary syndrome and coronary  
26 revascularization), composite ischemic events (coronary events and stroke), and composite  
27 heart failure and renal events.

28 **Results:** During follow up (median, 43.4 months), the incidence of composite coronary events  
29 was significantly lower in the SGLT2i groups than in the control group, and the incidence of  
30 composite ischemic events was lower in the dapagliflozin group than in the control group.  
31 Dapagliflozin and empagliflozin both demonstrated significant benefits in terms of heart failure  
32 and renal outcomes, supported by renoprotective effects, as assessed by the change in  
33 glomerular filtration rate. At 24–36 months of treatment, the empagliflozin group had higher  
34 low-density lipoprotein cholesterol levels, and lower glycated hemoglobin levels, compared to  
35 those in the dapagliflozin and control groups.

36 **Conclusion:** SGLT2i use was associated with a significantly reduced risk of atherosclerotic  
37 cardiovascular events, heart failure hospitalization, and renal events, compared to that with  
38 DPP4i use. There were no significant differences in clinical outcomes between dapagliflozin  
39 and empagliflozin, supporting a SGLT2i class effect.

## 40 **Introduction**

41           Type 2 diabetes is a major risk factor for macrovascular and microvascular diseases  
42 (1). The treatment strategy for type 2 diabetes has evolved from glycemic control to patient-  
43 centered approaches, with consideration of the risk of atherosclerotic cardiovascular disease  
44 (ASCVD), chronic kidney disease (CKD), and heart failure (HF) (2). This expansion in  
45 therapeutic strategy is mainly based on the introduction of new anti-hyperglycemic agents,  
46 such as sodium glucose co-transporter 2 inhibitors (SGLT2i), which were the first to  
47 demonstrate a prognostic benefit. Large-scale clinical trials of two SGLT2i, empagliflozin and  
48 dapagliflozin, have shown direct and indirect evidence for their significant cardiovascular and  
49 renal protective effects in patients with type 2 diabetes (3-8). As microvascular dysfunction,  
50 inflammation, oxidative stress, and fibrosis contribute to the progression of diabetic kidney  
51 disease and HF, SGLT2i-mediated attenuations in these pathways may contribute to  
52 cardiovascular and renal protection (9, 10). Several meta-analyses have suggested that there is  
53 a class effect for SGLT2i (11-14). However, a few retrospective studies have suggested  
54 differences in effects between SGLT2i, favoring the use of dapagliflozin over empagliflozin in  
55 terms of HF prevention (15, 16). On the other hand, a few studies have indicated more favorable  
56 glycemic control and management of cardiometabolic parameters with empagliflozin than with  
57 dapagliflozin (17, 18). Despite potential differences in benefit profiles, no trial has directly  
58 compared these SGLT2i in terms of clinical outcomes.

59           Therefore, in the present retrospective study, we aimed to compare the cardiovascular  
60 and renal outcomes between dapagliflozin and empagliflozin in patients with type 2 diabetes  
61 without prior ASCVD, CKD, or HF, and assess their impact on lipid profiles, glycemic control,  
62 and renal function.

63

## 64 **Materials and methods**

### 65 **Study population**

66 Patients with type 2 diabetes prescribed empagliflozin, dapagliflozin, or a dipeptidyl  
67 peptidase-4 inhibitor (DPP4i) at Seoul National University Bundang Hospital from April 2009  
68 to December 2020 were retrospectively identified (19). The date of medication (SGLT2i or  
69 DPP4i) initiation was defined as the index date. Exclusion criteria were type 1 diabetes mellitus,  
70 prior HF, prior ASCVD (angina, myocardial infarction, coronary revascularization, peripheral  
71 artery disease, and stroke), prior CKD (glomerular filtration rate [GFR] <45 mL/min/1.73m<sup>2</sup>),  
72 short duration of medication use (<3 months), low medication possession ratio (<75%), and  
73 simultaneous or sequential use of empagliflozin and dapagliflozin.

74 In total, 921 patients treated with empagliflozin, 1,424 patients treated with  
75 dapagliflozin, and 10,981 patients treated with DPP4i (control group) were identified (**Fig 1**).  
76 After propensity-score matching (1:1:2 ratio) on clinical factors, laboratory findings, and  
77 medication use, the empagliflozin and dapagliflozin groups comprised 921 patients each, and  
78 the DPP4i (control) group comprised 1,842 patients (**Fig 1**). Seoul National Bundang  
79 Hospital's Institutional Review Board approved the study protocol and waived the requirement  
80 for informed consent.

81  
82 **Fig 1. Study flowchart.** After 1:1:2 propensity score matching, there were 921 patients treated  
83 with empagliflozin, 921 patients treated with dapagliflozin, and 1,842 patients treated with  
84 DPP4i (control group).

85 ASCVD, atherosclerotic cardiovascular disease; CKD, chronic kidney disease; DPP4i,  
86 dipeptidyl peptidase-4 inhibitor; GLP1RA, glucagon-like peptide 1 receptor agonists; HF, heart  
87 failure; SGLT2i, sodium-glucose co-transporter 2 inhibitor

88

## 89 **Measurements**

90 We collected data on age, sex, systolic blood pressure, diastolic blood pressure, history  
91 of smoking, preexisting comorbidities, medications, and laboratory findings, including the lipid  
92 profile, fasting glucose level, glycated hemoglobin (HbA1c) level, and GFR.

93

## 94 **Outcomes**

95 Study outcomes comprised composite coronary events (acute coronary syndrome and  
96 coronary revascularization), composite ischemic events (acute coronary syndrome, coronary  
97 revascularization, and stroke), hospitalization for HF (HHF), renal events (renal death,  
98 initiation of renal replacement therapy, and admission due to acute kidney injury or CKD  
99 progression), and composite HHF and renal events. Changes in the levels of total cholesterol,  
100 low-density lipoprotein cholesterol (LDLc), and HbA1c, and GFR during follow up were also  
101 assessed.

102

## 103 **Statistical analysis**

104 To adjust for imbalances in the baseline characteristics of patients among  
105 empagliflozin, dapagliflozin, and control groups, propensity-score matching, with a 1:1:2 ratio,  
106 was performed using the nearest neighbor method, with the following covariates: age, sex, 10-  
107 year ASCVD risk, systolic blood pressure, presence of microalbuminuria/proteinuria, HbA1c  
108 level, GFR, and the use of antiplatelet agents, renin-angiotensin system blockers, and statins.  
109 The distributions of propensity scores and standardized mean differences were calculated to  
110 assess the strength of matching.

111 Categorical variables are presented as numbers with percentages, and continuous

112 variables as medians with interquartile ranges (IQRs). Group comparisons were performed  
113 using the  $\chi^2$  test for categorical variables and analysis of variance for continuous variables.  
114 Hazard ratios (HRs) with 95% confidence intervals (CIs) were estimated using the Cox  
115 proportional-hazards method.

116 Statistical analyses were performed using SPSS version 22.0 (IBM Co., Armonk, NY,  
117 USA) and R version 4.0.2 (The R Foundation for Statistical Computing, Vienna, Austria).  
118 Two-sided p-values <0.05 were considered statistically significant.

119

## 120 **Results**

### 121 **Baseline characteristics**

122 The baseline characteristics, laboratory findings, and use of medications were well  
123 balanced among the groups (**Table 1**). The median age was 56, 56, and 57 years in the  
124 dapagliflozin, empagliflozin, and control groups, respectively, and two-thirds of the patients  
125 were male. The prevalence of current smoking, hypertension, and dyslipidemia was 20%, 60%,  
126 and 80%, respectively. The mean 10-year ASCVD risk ranged 10%–11%, without significant  
127 inter-group differences. In all three groups, the median HbA1c level was approximately 8.0%  
128 and median GFR was approximately 97 mL/min/1.73m<sup>2</sup>, and the prevalence of  
129 microalbuminuria or proteinuria was more than 30%. Two-thirds of the patients were on statins,  
130 and less than 50% were on RAS blockers. Regarding anti-diabetic medication, more than 97%  
131 of the patients were on metformin, more than 40% were on sulfonylurea, and 18% were on  
132 insulin therapy.

133 **Table 1. Baseline characteristics**

|                                                          | Dapagliflozin (n=921) | Empagliflozin (n=921) | Control (n=1,842) | p-value |
|----------------------------------------------------------|-----------------------|-----------------------|-------------------|---------|
| <b><i>Clinical characteristics</i></b>                   |                       |                       |                   |         |
| Age (years)                                              | 56 (48–65)            | 56 (48–64)            | 57 (48–66)        | 0.321   |
| Male sex                                                 | 610 (66.2%)           | 611 (66.3%)           | 1177 (63.9%)      | 0.314   |
| Systolic blood pressure (mmHg)                           | 134 (123–149)         | 134 (122–147)         | 133 (121–145)     | 0.034   |
| Diastolic blood pressure (mmHg)                          | 79 (70–88)            | 79 (71–88)            | 78 (71–87)        | 0.406   |
| Body-mass index (kg/m <sup>2</sup> )                     | 26.0 (24.0–28.7)      | 26.3 (24.0–28.9)      | 25.1 (22.7–27.7)  | 0.061   |
| Current smoker                                           | 167 (18.1%)           | 186 (20.2%)           | 385 (20.9%)       | 0.228   |
| Hypertension                                             | 541 (58.7%)           | 538 (58.4%)           | 1131 (61.4%)      | 0.215   |
| Dyslipidemia                                             | 734 (79.7%)           | 702 (76.2%)           | 1462 (79.4%)      | 0.110   |
| Atrial fibrillation                                      | 30 (3.3%)             | 28 (3.0%)             | 70 (3.8%)         | 0.541   |
| 10-year ASCVD risk (%)                                   | 10.6 (4.2–22.6)       | 10.4 (4.5–22.6)       | 11.4 (4.5–24.2)   | 0.513   |
| <b><i>Laboratory findings</i></b>                        |                       |                       |                   |         |
| Total cholesterol (mg/dL)                                | 159 (138–190)         | 161 (140–190)         | 161 (134–197)     | 0.642   |
| HDL cholesterol (mg/dL)                                  | 47 (40–54)            | 46 (40–54)            | 46 (39–53)        | 0.057   |
| LDL cholesterol (mg/dL)                                  | 104 (85–126)          | 106 (86–128)          | 102 (79–131)      | 0.125   |
| Fasting glucose (mg/dL)                                  | 157 (128–189)         | 158 (128–199)         | 159 (127–208)     | 0.110   |
| Hemoglobin A1c (%)                                       | 8.1 (7.3–9.1)         | 8.3 (7.3–9.5)         | 8.0 (7.1–9.5)     | 0.087   |
| Creatinine (mg/dL)                                       | 0.8 (0.7–0.9)         | 0.8 (0.7–0.9)         | 0.8 (0.6–0.9)     | 0.745   |
| Glomerular filtration rate (mL/min/1.73 m <sup>2</sup> ) | 96.6 (85.3–106.0)     | 96.7 (84.9–105.9)     | 96.5 (83.7–106.4) | 0.700   |
| Microalbuminuria or proteinuria                          | 335 (36.4%)           | 336 (36.5%)           | 640 (34.7%)       | 0.565   |

**Medications**

|                            |             |             |              |       |
|----------------------------|-------------|-------------|--------------|-------|
| Antiplatelet agents        | 231 (25.1%) | 220 (23.9%) | 471 (25.6%)  | 0.629 |
| Statins                    | 615 (66.8%) | 600 (65.1%) | 1196 (64.9%) | 0.615 |
| Calcium channel blockers   | 258 (28.0%) | 246 (26.7%) | 558 (30.3%)  | 0.120 |
| RAS blocker                | 449 (48.8%) | 423 (45.9%) | 835 (45.3%)  | 0.226 |
| Beta blockers              | 88 (9.6%)   | 77 (8.4%)   | 153 (8.3%)   | 0.515 |
| Diuretics                  | 107 (11.6%) | 122 (13.2%) | 247 (13.4%)  | 0.393 |
| Direct oral anticoagulants | 22 (2.4%)   | 20 (2.2%)   | 55 (3.0%)    | 0.392 |
| Insulin                    | 168 (18.2%) | 166 (18.0%) | 341 (18.5%)  | 0.950 |
| Metformin                  | 897 (97.4%) | 896 (97.3%) | 1789 (97.1%) | 0.913 |
| Sulfonylurea               | 407 (44.2%) | 392 (42.6%) | 763 (41.4%)  | 0.379 |
| Thiazolidinedione          | 81 (8.8%)   | 80 (8.7%)   | 144 (7.8%)   | 0.594 |
| GLP1 receptor agonists     | 2 (0.2%)    | 2 (0.2%)    | 8 (0.4%)     | 0.596 |

134 Values are medians with interquartile ranges (IQR; Q1–Q3).

135 ASCVD, atherosclerotic cardiovascular disease; GLP1, glucagon-like peptide 1; HDL, high-density lipoprotein; HHF, hospitalization for heart

136 failure; LDL, low-density lipoprotein; RAS, renin-angiotensin system



## 137 **Clinical outcomes**

138           The median follow-up duration was 37.3 months (IQR, 24.5–55.7 months), 37.1  
139 months (IQR 27.1–49.2 months), and 55.1 months (27.5–84.9 months) in the dapagliflozin,  
140 empagliflozin, and control groups, respectively (**Table 2**). Composite coronary events occurred  
141 in 6 patients (0.7%) in the dapagliflozin group, 10 patients (1.1%) in the empagliflozin group,  
142 and 55 patients (3.0%) in the control group. On multivariable analysis, advanced age, current  
143 smoking, presence of hypertension, and higher 10-year ASCVD risk were associated with a  
144 higher risk of composite coronary and ischemic events (**Table 3**). SGLT2i use was significantly  
145 associated with a lower incidence of composite coronary events (dapagliflozin vs. control: HR,  
146 0.267; 95% CI, 0.114–0.627;  $p=0.002$ ) (empagliflozin vs. control: HR, 0.467; 95% CI, 0.235–  
147 0.929;  $p=0.030$ ), without a significant difference between dapagliflozin and empagliflozin  
148 groups (HR, 2.196; 95% CI, 0.742–6.502;  $p=0.156$ ) (**Fig 2A**). Likewise, compared to that in  
149 the control group, the occurrence of composite ischemic events was significantly less frequent  
150 in the dapagliflozin group, and tended to be lower in the empagliflozin group, without a  
151 significant difference between dapagliflozin and empagliflozin groups (**Fig 2B**).

152 **Table 2. Clinical outcomes**

|                                                     | <b>Dapagliflozin (n=921)</b> | <b>Empagliflozin (n=921)</b> | <b>Control (n=1,842)</b> | <b>p-value</b> |
|-----------------------------------------------------|------------------------------|------------------------------|--------------------------|----------------|
| Follow-up duration (months)                         | 37.3 (24.5–55.7)             | 37.1 (27.1–49.2)             | 55.1 (27.5–84.9)         | <0.001         |
| All-cause death                                     | 2 (0.2%)                     | 2 (0.2%)                     | 60 (3.3%)                | <0.001         |
| Cardiovascular death                                | 1 (0.1%)                     | 2 (0.2%)                     | 5 (0.3%)                 | 0.897          |
| Acute coronary syndrome                             | 2 (0.2%)                     | 2 (0.2%)                     | 31 (1.7%)                | <0.001         |
| Coronary revascularization                          | 5 (0.5%)                     | 7 (0.8%)                     | 39 (2.1%)                | 0.001          |
| Stroke                                              | 3 (0.3%)                     | 2 (0.2%)                     | 4 (0.2%)                 | 0.908          |
| HHF                                                 | 3 (0.3%)                     | 6 (0.7%)                     | 40 (2.2%)                | <0.001         |
| Renal events (renal admission, progression to ESRD) | 2 (0.2%)                     | 2 (0.2%)                     | 30 (1.6%)                | <0.001         |
| Composite coronary events                           | 6 (0.7%)                     | 10 (1.1%)                    | 55 (3.0%)                | <0.001         |
| Composite ischemic events                           | 11 (1.2%)                    | 14 (1.5%)                    | 59 (3.2%)                | 0.001          |
| Composite of HHF and renal events                   | 4 (0.4%)                     | 8 (0.9%)                     | 64 (3.5%)                | <0.001         |

153 ESRD, end-stage renal disease; HHF, hospitalization for heart failure

154 **Table 3. Multivariable predictors of ischemic events**

|                              | Composite coronary events* |               |         | Composite ischemic events† |               |         |
|------------------------------|----------------------------|---------------|---------|----------------------------|---------------|---------|
|                              | Adjusted HR                | 95% CI        | p-value | Adjusted HR                | 95% CI        | p-value |
| Age (per +1 year)            | 1.024                      | 1.004 – 1.045 | 0.021   | 1.026                      | 1.007 – 1.045 | 0.006   |
| Current smoker               | 1.788                      | 1.077 – 2.968 | 0.025   | 2.039                      | 1.295 – 3.213 | 0.002   |
| Hypertension                 | 3.611                      | 1.831 – 7.122 | <0.001  | 3.081                      | 1.690 – 5.615 | <0.001  |
| 10-year ASCVD risk (per +1%) | 1.024                      | 1.012 – 1.035 | <0.001  | 1.014                      | 1.003 – 1.026 | 0.015   |
| Antidiabetic medication      |                            |               |         |                            |               |         |
| - Control (DPP4i)            | <i>Reference</i>           |               |         | <i>Reference</i>           |               |         |
| - Dapagliflozin              | 0.267                      | 0.114 – 0.627 | 0.002   | 0.458                      | 0.238 – 0.881 | 0.019   |
| - Empagliflozin              | 0.467                      | 0.235 – 0.929 | 0.030   | 0.607                      | 0.334 – 1.103 | 0.102   |

155 Univariable factors with p-values <0.200 were entered into the multivariable Cox proportional hazard regression analysis using the stepwise  
 156 backward elimination method.

157 \* Composite coronary events included acute coronary syndrome and coronary revascularization.

158 † Composite ischemic events included acute coronary syndrome, coronary revascularization, and stroke.

159 ASCVD, atherosclerotic cardiovascular disease; CI, confidence interval; DPP4i, dipeptidyl peptidase-4 inhibitor; HR, hazard ratio

160 **Fig 2. Event-free survival curves for atherosclerotic events.** Kaplan-Meier curves  
161 comparing the risk of **(A)** composite coronary events and **(B)** composite ischemic events  
162 between the 3 groups.

163 CI, confidence interval; HR, hazard ratio; SGLT2i, sodium-glucose co-transporter 2 inhibitor

164

165 Composite HHF and renal events occurred in 4 patients (0.4%) in the dapagliflozin  
166 group and 8 patients (0.9%) in the empagliflozin group (**Table 2**). Significant risk factors for  
167 HHF and renal events comprised atrial fibrillation, impaired renal function, and the presence  
168 of microalbuminuria or proteinuria (**Table 4**). Both dapagliflozin and empagliflozin  
169 demonstrated significant beneficial effects against HHF and renal events compared to that with  
170 DPP4i (dapagliflozin vs. control: HR, 0.186; 95% CI, 0.067–0.516; p=0.001) (empagliflozin  
171 vs. control: HR, 0.358; 95% CI, 0.169–0.756; p=0.007) (**Fig 3**).

172 **Table 4. Multivariable predictors of HF and renal events**

|                                         | HHF              |                |         | Renal events*    |               |         | Composite of HHF and renal events |               |         |
|-----------------------------------------|------------------|----------------|---------|------------------|---------------|---------|-----------------------------------|---------------|---------|
|                                         | Adjusted HR      | 95% CI         | p-value | Adjusted HR      | 95% CI        | p-value | Adjusted HR                       | 95% CI        | p-value |
| Age (per +1 year)                       | 1.022            | 0.998 – 1.048  | 0.076   | -                | -             | -       | -                                 | -             | -       |
| Hypertension                            | 1.961            | 0.960 – 4.003  | 0.064   | -                | -             | -       | -                                 | -             | -       |
| Atrial fibrillation                     | 6.888            | 3.398 – 13.961 | <0.001  | -                | -             | -       | 4.431                             | 2.355 – 8.337 | <0.001  |
| HbA1c (per +1%)                         | 1.145            | 1.002 – 1.309  | 0.047   | 0.786            | 0.622 – 0.994 | 0.044   | -                                 | -             | -       |
| GFR (per +1 mL/min/1.73m <sup>2</sup> ) | -                | -              | -       | 0.971            | 0.954 – 0.988 | 0.001   | 0.983                             | 0.972 – 0.995 | 0.005   |
| Microalbuminuria or proteinuria         | 1.668            | 0.928 – 2.996  | 0.087   | 2.993            | 1.444 – 6.205 | 0.003   | 2.225                             | 1.402 – 3.531 | 0.001   |
| Antidiabetic medication                 |                  |                |         |                  |               |         |                                   |               |         |
| - Control (DPP4i)                       | <i>Reference</i> |                |         | <i>Reference</i> |               |         | <i>Reference</i>                  |               |         |
| - Dapagliflozin                         | 0.182            | 0.056 – 0.593  | 0.005   | 0.235            | 0.055 – 1.002 | 0.050   | 0.186                             | 0.067 – 0.516 | 0.001   |
| - Empagliflozin                         | 0.349            | 0.147 – 0.832  | 0.018   | 0.219            | 0.051 – 0.932 | 0.040   | 0.358                             | 0.169 – 0.756 | 0.007   |

173 Univariable factors with p-values <0.200 were entered into the multivariable Cox proportional hazard regression analysis using the stepwise

174 backward elimination method.

175 \* Renal events included renal death, hospitalization for acute kidney injury, and progression to end-stage renal disease.

176 CI, confidence interval; DPP4i, dipeptidyl peptidase-4 inhibitor; GFR, glomerular filtration rate; HbA1c, glycated hemoglobin A1c; HHF,

177 hospitalization for heart failure; HR, hazard ratio

178 **Fig 3. Event-free survival curves for HHF and renal events.** Kaplan-Meier curves  
179 comparing the risk of (A) HHF, (B) composite renal events, and (C) composite HHF and renal  
180 events between the 3 groups.

181 CI, confidence interval; HHF, hospitalization for heart failure; HR, hazard ratio; SGLT2i,  
182 sodium-glucose co-transporter 2 inhibitor

183

## 184 **Laboratory findings**

185 Changes in the levels of total cholesterol, LDLc, and HbA1c, and GFR during follow  
186 up are shown according to group in **Fig 4**. At baseline, there were no significant inter-group  
187 differences in the levels of total cholesterol, LDLc, and HbA1c, and GFR. Overall, the total  
188 cholesterol level did not show inter-group differences during follow up (**Fig 4A**). However, at  
189 24 and 36 months of treatment, the LDLc level was significantly higher in the empagliflozin  
190 group than in the control and dapagliflozin groups (**Fig 4B**), and the HbA1c level was  
191 significantly lower in the empagliflozin group than in the other groups (**Fig 4C**). Additionally,  
192 the GFR level tended to be better preserved at 24 months of treatment, and was significantly  
193 higher at 36 months and 48 months of treatment, in the dapagliflozin and empagliflozin groups  
194 than in the control group (**Fig 4D**).

195

196 **Fig 4. Changes in laboratory findings.** Serial changes in (A) total cholesterol, (B) LDL  
197 cholesterol, (C) HbA1c, and (D) GFR are plotted according to group.

198 GFR, glomerular filtration rate; HbA1c, glycosylated hemoglobin; LDL, low-density  
199 lipoprotein; SGLT2i, sodium-glucose co-transporter 2 inhibitor

## 200 **Discussion**

201 In this retrospective study, we compared cardiovascular and renal outcomes among  
202 dapagliflozin, empagliflozin, and DPP4i (control) groups in 3,684 patients with type 2 diabetes  
203 and without prior ASCVD, HF, and CKD. Patients treated with SGLT2i demonstrated a  
204 significantly lower risk of atherosclerotic events, HHF, and renal events than that in patients  
205 treated with DPP4i (control group), with significant benefits in renal protection as assessed by  
206 the GFR level. There were no significant differences in clinical outcomes between  
207 dapagliflozin and empagliflozin groups. Of note, at 24–36 months of treatment, we observed  
208 higher LDLc levels and lower HbA1c levels in the empagliflozin group than in the other groups.  
209

### 210 **Clinical benefits of SGLT2i**

211 A series of landmark trials provided robust evidence on the cardiovascular and renal  
212 benefits of SGLT2i, regardless of baseline ASCVD status. In the EMPA-REG outcome trial,  
213 empagliflozin was associated with a reduced risk of cardiovascular death (HR, 0.86; 95% CI,  
214 0.74 to 0.99; p=0.04 for superiority) in patients with type 2 diabetes and established ASCVD  
215 (6). Canagliflozin showed a reduced risk for HHF and cardiovascular death (HR, 0.78; 95%  
216 CI, 0.52-0.87; p=0.02) and composite renal outcomes (HR, 0.6; 95% CI, 0.47 to 0.77; p<0.001)  
217 in patients with type 2 diabetes, two-thirds of whom had established ASCVD (3, 4). In the  
218 DECLARE–TIMI 58 trial, dapagliflozin showed a lower rate of cardiovascular death and HHF  
219 compared to that with placebo in patients with type 2 diabetes with established ASCVD (40%)  
220 or at high risk for ASCVD (60%) (HR, 0.83; 95% CI, 0.73–0.95; p=0.005) (5). In a meta-  
221 analysis, SGLT2i use was associated with a reduced risk of major adverse cardiovascular  
222 events, HHF, and adverse kidney outcomes, independent of baseline ASCVD status (20).

223 Furthermore, the benefits of SGLT2i use have been observed in patients without prior

224 cardiovascular disease, HF, or CKD. In the EMPRISE East Asia study, empagliflozin treatment  
225 was associated with a 28% reduced risk for HHF in patients with diabetes without CVD (21);  
226 SGLT2i use showed a 36% risk reduction for HHF among patients with diabetes without prior  
227 HF (22); and SGLT2i use resulted in a 30%–40% reduction in the risk of HHF and 40%–50%  
228 reduction in the risk of adverse renal outcomes among patients with diabetes with GFR  $\geq 60$   
229 mL/min/1.73m<sup>2</sup> (23). These findings support the benefits of SGLT2i for primary prevention in  
230 patients with type 2 diabetes but without overt ASCVD, HF, or CKD.

231

## 232 **Direct comparisons between dapagliflozin and empagliflozin**

233 Given the concordant benefits of various SGLT2i, as well as their similar  
234 pharmacologic profiles, a class effect has been suggested for this drug entity. Although there  
235 have been some discrepancies in the reported clinical outcomes in clinical trials, this can be  
236 explained by differences in the inclusion criteria, baseline characteristics, and outcome  
237 definitions. However, several studies have suggested that SGLT2i effects may differ according  
238 to drug type. According to a multi-institutional cohort study by Shao et al., dapagliflozin may  
239 offer a more favorable benefit in terms of HF prevention, compared to that with empagliflozin  
240 (15). In another study by Shao et al., dapagliflozin had a more favorable HHF risk reduction  
241 than empagliflozin in patients with type 2 diabetes without ASCVD, while similar HHF risks  
242 were observed in patients with type 2 diabetes with ASCVD (16). The more potent effects of  
243 dapagliflozin over empagliflozin for HF outcomes can be explained by the SGLT2:SGLT1  
244 receptor selectivity ratio, which is lower for dapagliflozin (1200:1) than for empagliflozin  
245 (2500:1) (24, 25). More specifically, myocardial ischemia and hypertrophy are associated with  
246 SGLT1 upregulation in the myocardium, where SGLT2 receptors are never expressed. This  
247 finding suggests that the SGLT2i with a lower specificity for SGLT2 receptors, and thus, a



248 greater effect on SGLT1, has an even greater beneficial effect on HF prevention (26). In  
249 addition, compared to that with empagliflozin, dapagliflozin did not increase plasma  
250 aldosterone and noradrenaline levels, which could be advantageous for HF prevention (27).

251 In the present study, the benefits for HF and renal outcomes did not differ between  
252 dapagliflozin and empagliflozin groups. The changes in GFR also demonstrated similar  
253 patterns for these two SGLT2i, which showed significant benefits over DPP4i treatment  
254 (control group). Thus, in contrast to the studies by Shao et al.,(15, 16) we did not observe a  
255 more favorable benefit with dapagliflozin than with empagliflozin in terms of HF and renal  
256 outcomes. However, we acknowledge that the present study had a relatively small sample size  
257 and was performed in a retrospective manner. Although our findings support a SGLT2i class  
258 effect on HF and renal outcomes, future studies are warranted to compare their effects in a  
259 prospective trial or using nationwide real-world data.

260 Regarding the risk of ischemic events, a prospective observational study by Ku et al.  
261 found that empagliflozin resulted in better glycemic control and improvements in  
262 cardiometabolic components than that with dapagliflozin among patients with type 2 diabetes  
263 (17, 18). Similarly, in the present study, we found that HbA1c levels were significantly lower  
264 in the empagliflozin group than in the dapagliflozin and control groups. However, the LDLc  
265 levels at 24 and 36 months of treatment were higher in the empagliflozin group than in the  
266 other groups. It should be noted that better glycemic control, but higher LDLc level, with  
267 empagliflozin was not associated with clinical events; the risk of composite coronary and  
268 ischemic events was significantly lower in both SGLT2i groups than in the control group,  
269 without a significant difference between dapagliflozin and empagliflozin. Therefore, our study  
270 supports a SGLT2i class effect and, simultaneously, suggests that the benefits of SGLT2i use  
271 for ASCVD prevention are independent of the management of glucose and lipid profile. In  
272 particular, it has been suggested that SGLT2i can prevent endothelial dysfunction by reducing

273 oxidative stress and sympathetic activation, reduce inflammatory cytokines, and reduce the  
274 plaque size while stabilizing their vulnerability (28).

275

## 276 **Study limitations**

277 First, due to the relatively small sample size, the number of clinical events might not  
278 have been adequate to demonstrate a difference between dapagliflozin and empagliflozin.  
279 Second, laboratory tests were not performed with pre-specified schedules due to the  
280 retrospective nature of the study. However, more than 16,000 laboratory test results were  
281 included in the analysis, suggesting that our findings reflect real-world clinical practice. Third,  
282 although we used propensity-score matching to minimize differences in baseline characteristics  
283 between groups, some unmeasured confounders might remain unresolved.

284

## 285 **Conclusions**

286 SGLT2i use was associated with a significantly reduced risk of ASCVD, HHF, and  
287 renal events among patients with diabetes and without prior ASCVD, HF, or CKD. There were  
288 no significant differences between dapagliflozin and empagliflozin, supporting a SGLT2i class  
289 effect.

290

291

## 292 **Acknowledgements**

293 None.

## 294 **References**

- 295 1. Sarwar N, Gao P, Seshasai SR, Gobin R, Kaptoge S, Di Angelantonio E, et al. Diabetes  
296 mellitus, fasting blood glucose concentration, and risk of vascular disease: a collaborative  
297 meta-analysis of 102 prospective studies. *Lancet (London, England)*. 2010;375(9733):2215-  
298 22.
- 299 2. 9. Pharmacologic Approaches to Glycemic Treatment: Standards of Medical Care in  
300 Diabetes-2019. *Diabetes care*. 2019;42(Suppl 1):S90-s102.
- 301 3. Neal B, Perkovic V, Mahaffey KW, de Zeeuw D, Fulcher G, Erondy N, et al.  
302 Canagliflozin and Cardiovascular and Renal Events in Type 2 Diabetes. *The New England*  
303 *journal of medicine*. 2017;377(7):644-57.
- 304 4. Perkovic V, Jardine MJ, Neal B, Bompoint S, Heerspink HJL, Charytan DM, et al.  
305 Canagliflozin and Renal Outcomes in Type 2 Diabetes and Nephropathy. *The New England*  
306 *journal of medicine*. 2019;380(24):2295-306.
- 307 5. Wiviott SD, Raz I, Bonaca MP, Mosenzon O, Kato ET, Cahn A, et al. Dapagliflozin  
308 and Cardiovascular Outcomes in Type 2 Diabetes. *The New England journal of medicine*.  
309 2019;380(4):347-57.
- 310 6. Zinman B, Wanner C, Lachin JM, Fitchett D, Bluhmki E, Hantel S, et al.  
311 Empagliflozin, Cardiovascular Outcomes, and Mortality in Type 2 Diabetes. *The New England*  
312 *journal of medicine*. 2015;373(22):2117-28.
- 313 7. McMurray JJV, Solomon SD, Inzucchi SE, Køber L, Kosiborod MN, Martinez FA, et  
314 al. Dapagliflozin in Patients with Heart Failure and Reduced Ejection Fraction. *The New*  
315 *England journal of medicine*. 2019;381(21):1995-2008.
- 316 8. Hwang IC, Cho GY, Yoon YE, Park JJ, Park JB, Lee SP, et al. Different effects of  
317 SGLT2 inhibitors according to the presence and types of heart failure in type 2 diabetic patients.

- 318 Cardiovasc Diabetol. 2020;19(1):69.
- 319 9. Liu H, Sridhar VS, Boulet J, Dharia A, Khan A, Lawler PR, et al. Cardiorenal  
320 protection with SGLT2 inhibitors in patients with diabetes mellitus: from biomarkers to clinical  
321 outcomes in heart failure and diabetic kidney disease. *Metabolism: clinical and experimental*.  
322 2022;126:154918.
- 323 10. Verma S, McMurray JJV. SGLT2 inhibitors and mechanisms of cardiovascular benefit:  
324 a state-of-the-art review. *Diabetologia*. 2018;61(10):2108-17.
- 325 11. Toyama T, Neuen BL, Jun M, Ohkuma T, Neal B, Jardine MJ, et al. Effect of SGLT2  
326 inhibitors on cardiovascular, renal and safety outcomes in patients with type 2 diabetes mellitus  
327 and chronic kidney disease: A systematic review and meta-analysis. *Diabetes, obesity &*  
328 *metabolism*. 2019;21(5):1237-50.
- 329 12. Salah HM, Al'Aref SJ, Khan MS, Al-Hawwas M, Vallurupalli S, Mehta JL, et al. Effect  
330 of sodium-glucose cotransporter 2 inhibitors on cardiovascular and kidney outcomes-  
331 Systematic review and meta-analysis of randomized placebo-controlled trials. *American heart*  
332 *journal*. 2021;232:10-22.
- 333 13. Lo KB, Gul F, Ram P, Kluger AY, Tecson KM, McCullough PA, et al. The Effects of  
334 SGLT2 Inhibitors on Cardiovascular and Renal Outcomes in Diabetic Patients: A Systematic  
335 Review and Meta-Analysis. *Cardiorenal medicine*. 2020;10(1):1-10.
- 336 14. Zelniker TA, Wiviott SD, Raz I, Im K, Goodrich EL, Bonaca MP, et al. SGLT2  
337 inhibitors for primary and secondary prevention of cardiovascular and renal outcomes in type  
338 2 diabetes: a systematic review and meta-analysis of cardiovascular outcome trials. *Lancet*.  
339 2019;393(10166):31-9.
- 340 15. Shao SC, Chang KC, Hung MJ, Yang NI, Chan YY, Chen HY, et al. Comparative risk  
341 evaluation for cardiovascular events associated with dapagliflozin vs. empagliflozin in real-  
342 world type 2 diabetes patients: a multi-institutional cohort study. *Cardiovascular diabetology*.

343 2019;18(1):120.

344 16. Shao SC, Chang KC, Lin SJ, Chang SH, Hung MJ, Chan YY, et al. Differences in  
345 outcomes of hospitalizations for heart failure after SGLT2 inhibitor treatment: effect  
346 modification by atherosclerotic cardiovascular disease. *Cardiovascular diabetology*.  
347 2021;20(1):213.

348 17. Ku EJ, Lee DH, Jeon HJ, Oh TK. Empagliflozin versus dapagliflozin in patients with  
349 type 2 diabetes inadequately controlled with metformin, glimepiride and dipeptidyl peptide 4  
350 inhibitors: A 52-week prospective observational study. *Diabetes research and clinical practice*.  
351 2019;151:65-73.

352 18. Ku EJ, Lee D-H, Jeon HJ, Oh TK. Long-term effectiveness and safety of quadruple  
353 combination therapy with empagliflozin versus dapagliflozin in patients with type 2 diabetes:  
354 3-year prospective observational study. *Diabetes research and clinical practice*.  
355 2021;182:109123.

356 19. Kim CH, Hwang I-C, Ahn CH, Yoon YE, Cho G-Y. Differential Cardiovascular and  
357 Renal Benefits of SGLT2 Inhibitors and GLP1 Receptor Agonists in Patients With Type 2  
358 Diabetes Mellitus. Preprint at <https://doi.org/10.21203/rs.3.rs-734897/v1>. 2021.

359 20. McGuire DK, Shih WJ, Cosentino F, Charbonnel B, Cherney DZI, Dagogo-Jack S, et  
360 al. Association of SGLT2 Inhibitors With Cardiovascular and Kidney Outcomes in Patients  
361 With Type 2 Diabetes: A Meta-analysis. *JAMA cardiology*. 2021;6(2):148-58.

362 21. Seino Y, Kim DJ, Yabe D, Tan EC, Chung WJ, Ha KH, et al. Cardiovascular and renal  
363 effectiveness of empagliflozin in routine care in East Asia: Results from the EMPRISE East  
364 Asia study. *Endocrinology, diabetes & metabolism*. 2021;4(1):e00183.

365 22. Paterno E, Pawar A, Franklin JM, Najafzadeh M, Déruaz-Luyet A, Brodovicz KG, et  
366 al. Empagliflozin and the Risk of Heart Failure Hospitalization in Routine Clinical Care.  
367 *Circulation*. 2019;139(25):2822-30.

- 368 23. Cahn A, Raz I, Leiter LA, Mosenzon O, Murphy SA, Goodrich EL, et al.  
369 Cardiovascular, Renal, and Metabolic Outcomes of Dapagliflozin Versus Placebo in a Primary  
370 Cardiovascular Prevention Cohort: Analyses From DECLARE-TIMI 58. *Diabetes care*.  
371 2021;44(5):1159-67.
- 372 24. Anker SD, Butler J. Empagliflozin, calcium, and SGLT1/2 receptor affinity: another  
373 piece of the puzzle. *ESC heart failure*. 2018;5(4):549-51.
- 374 25. Täger T, Frankenstein L, Atar D, Agewall S, Frey N, Grundtvig M, et al. Influence of  
375 receptor selectivity on benefits from SGLT2 inhibitors in patients with heart failure: a  
376 systematic review and head-to-head comparative efficacy network meta-analysis. *Clinical  
377 research in cardiology : official journal of the German Cardiac Society*. 2022;111(4):428-39.
- 378 26. Perry RJ, Shulman GI. Sodium-glucose cotransporter-2 inhibitors: Understanding the  
379 mechanisms for therapeutic promise and persisting risks. *The Journal of biological chemistry*.  
380 2020;295(42):14379-90.
- 381 27. Nakagaito M, Joho S, Ushijima R, Nakamura M, Kinugawa K. Comparison of  
382 Canagliflozin, Dapagliflozin and Empagliflozin Added to Heart Failure Treatment in  
383 Decompensated Heart Failure Patients With Type 2 Diabetes Mellitus. *Circulation reports*.  
384 2019;1(10):405-13.
- 385 28. Pahud de Mortanges A, Salvador D, Jr., Laimer M, Muka T, Wilhelm M, Bano A. The  
386 Role of SGLT2 Inhibitors in Atherosclerosis: A Narrative Mini-Review. *Frontiers in  
387 pharmacology*. 2021;12:751214.

388

Figure 1

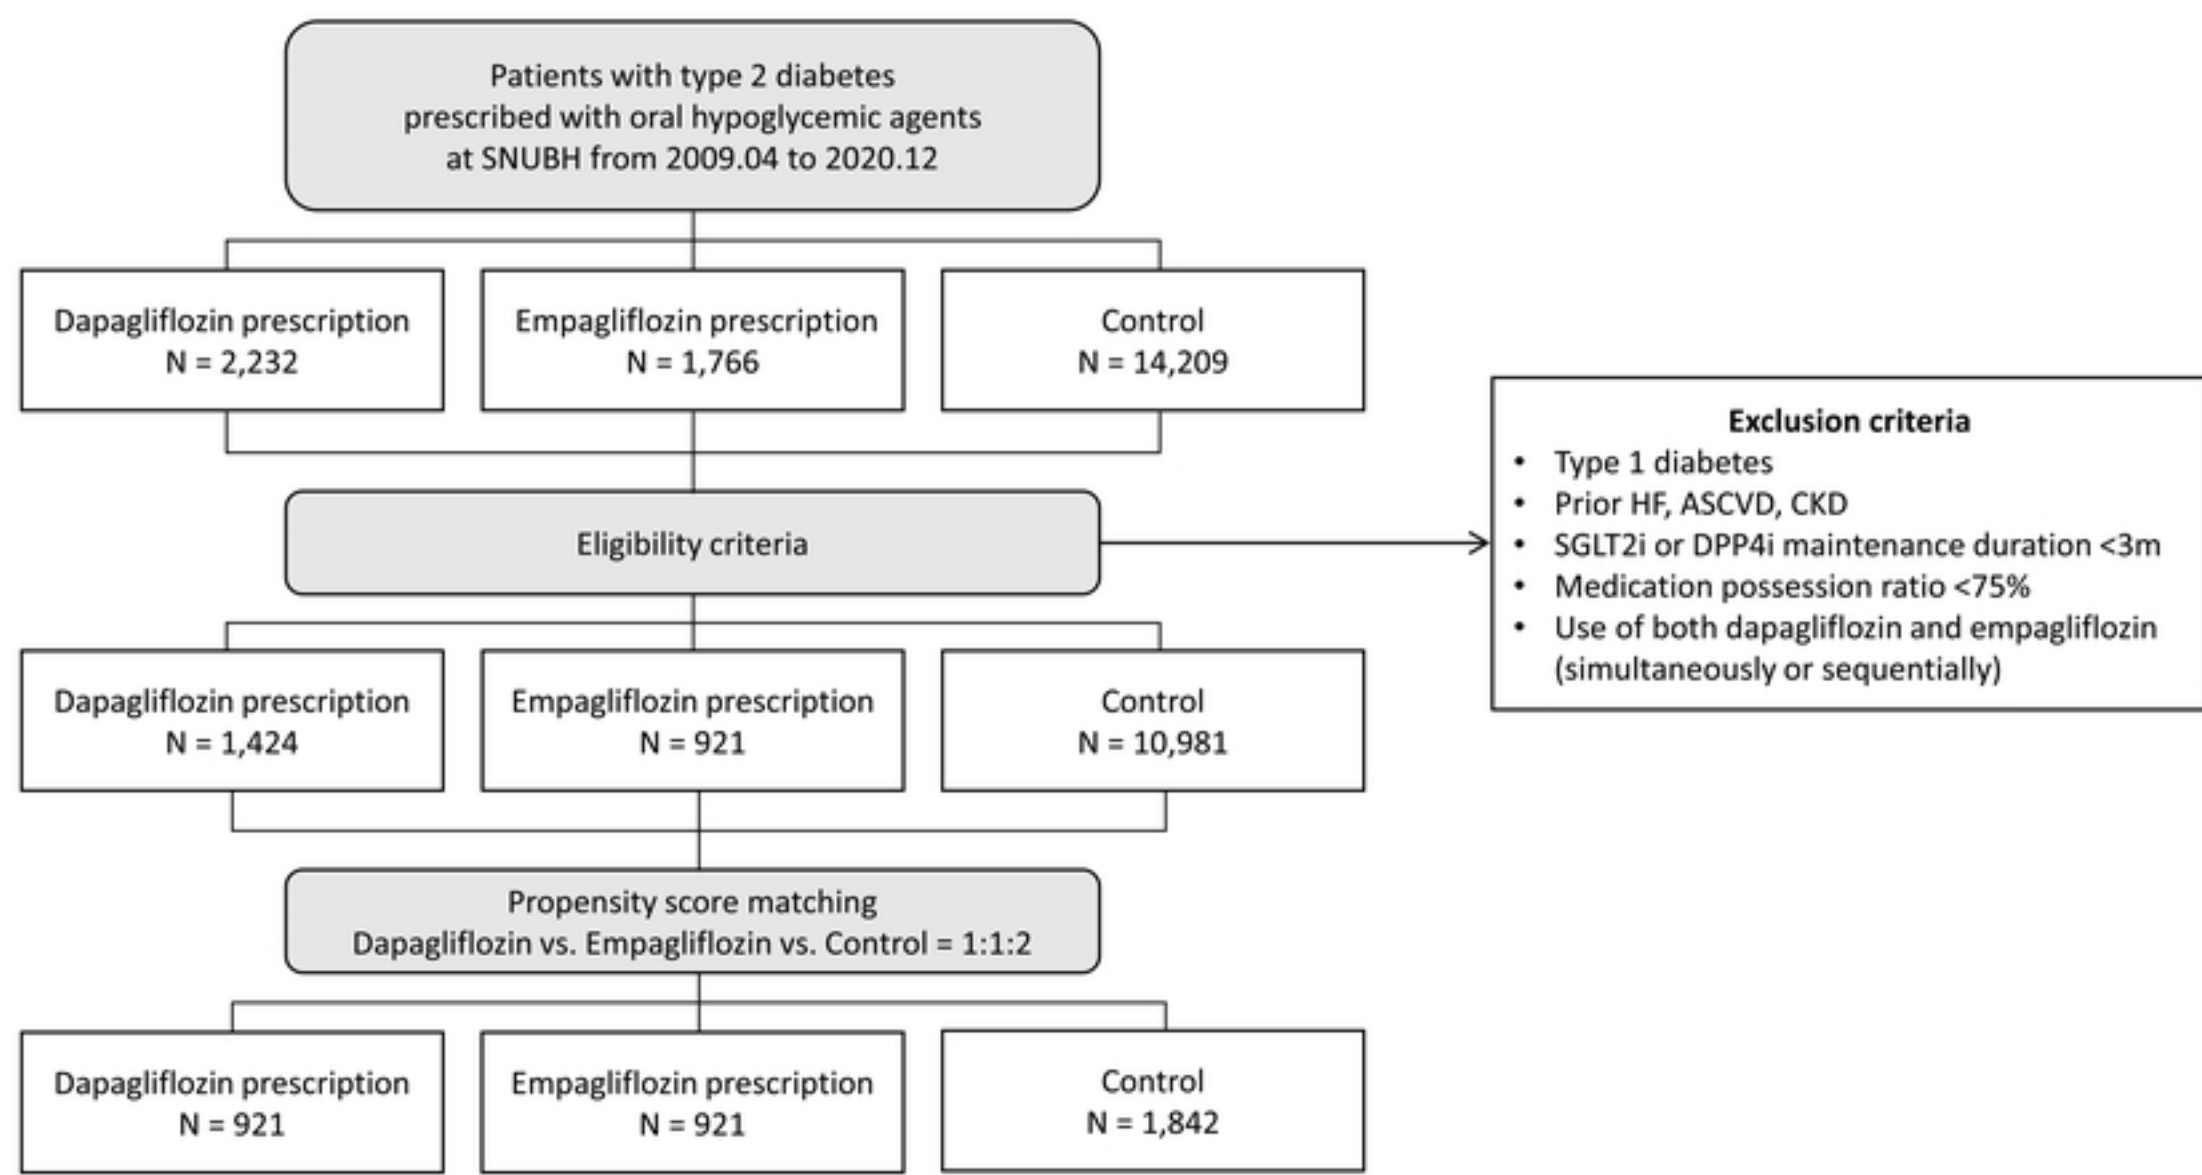

Figure 1

Figure 2

A

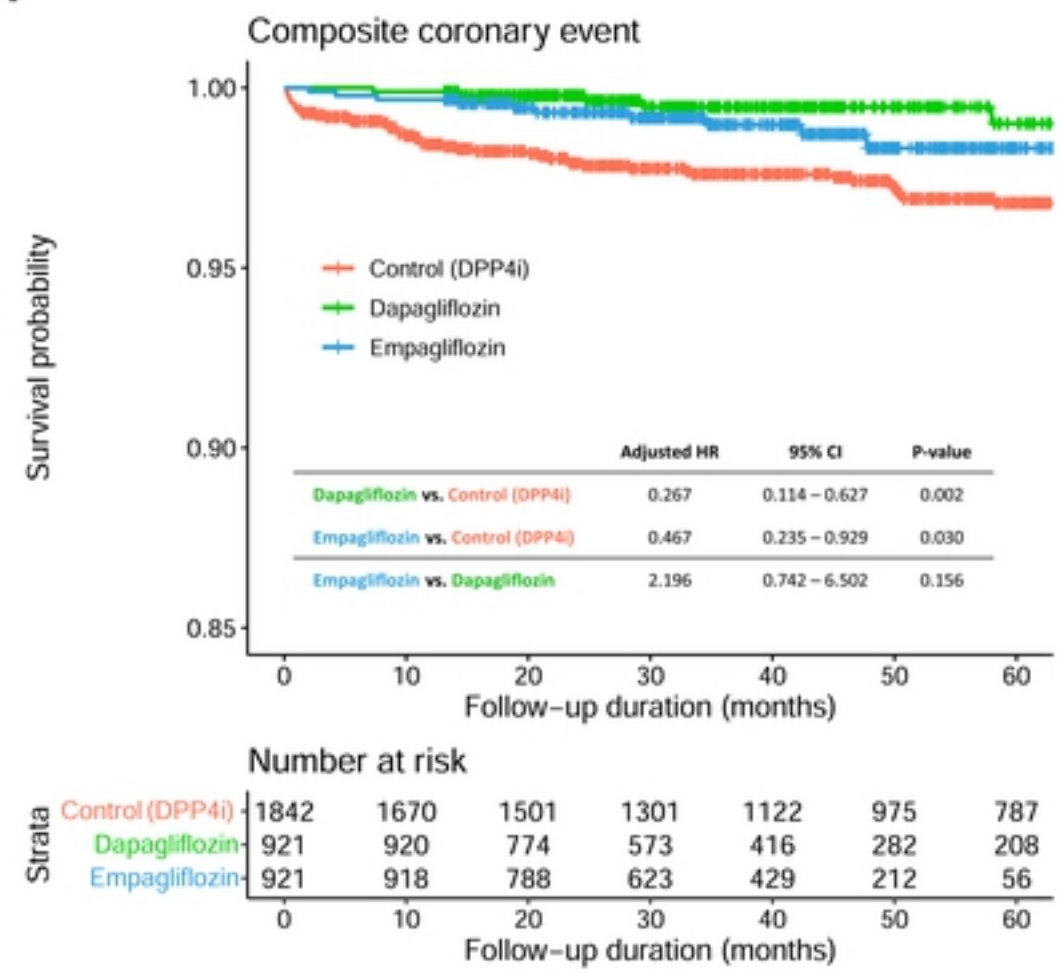

B

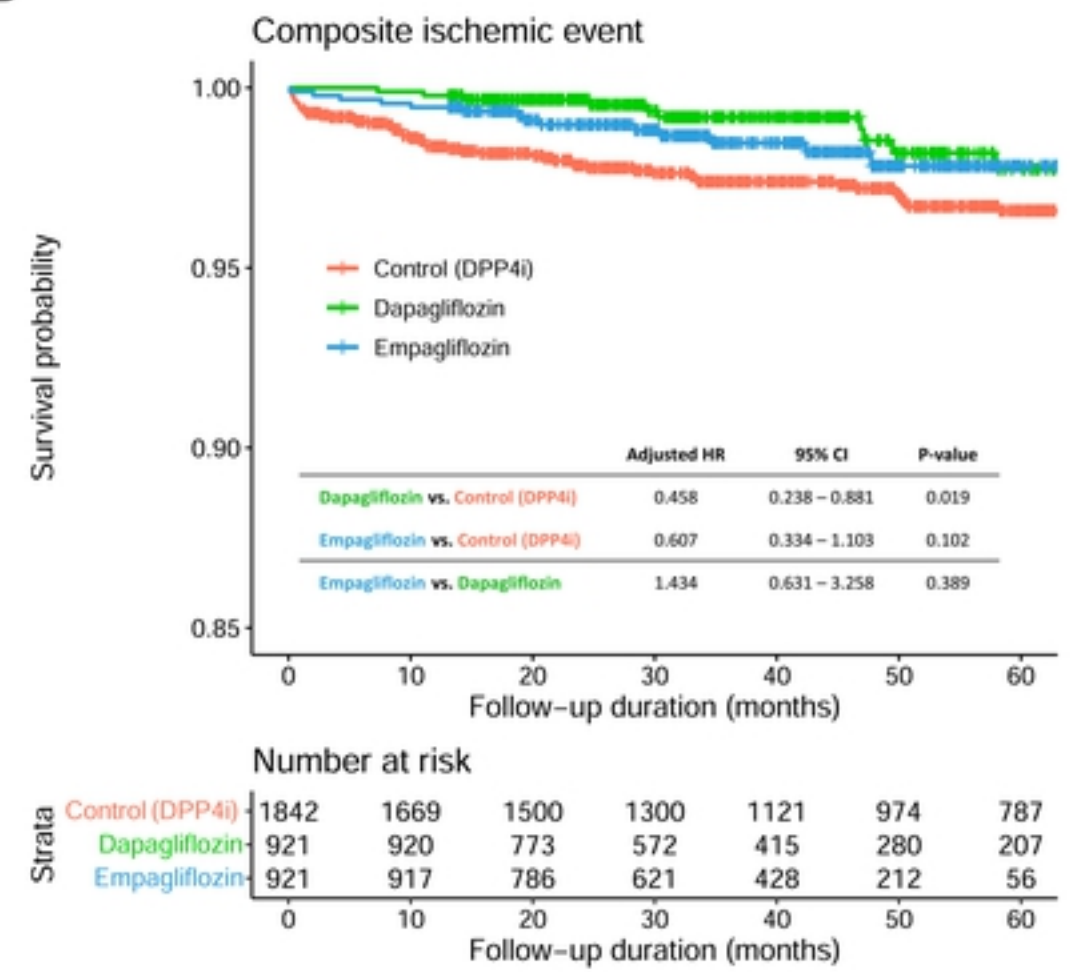

Figure 2



Figure 3

A

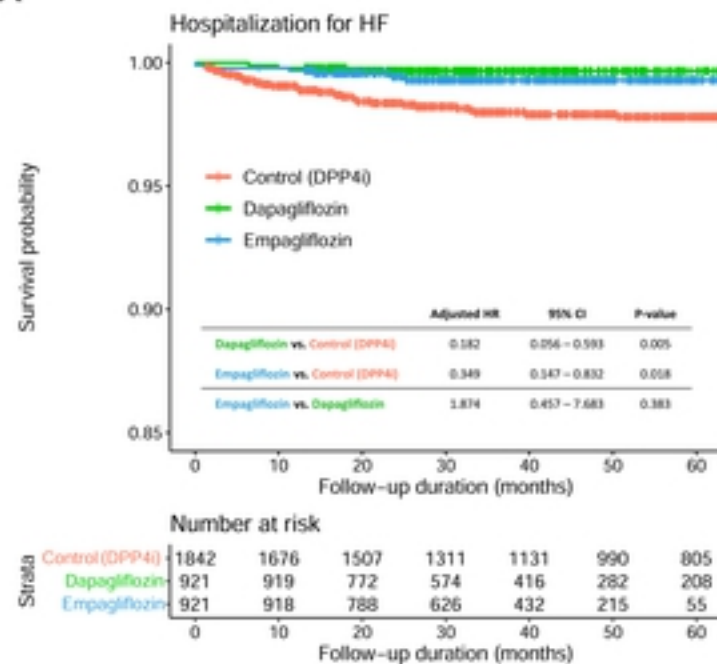

B

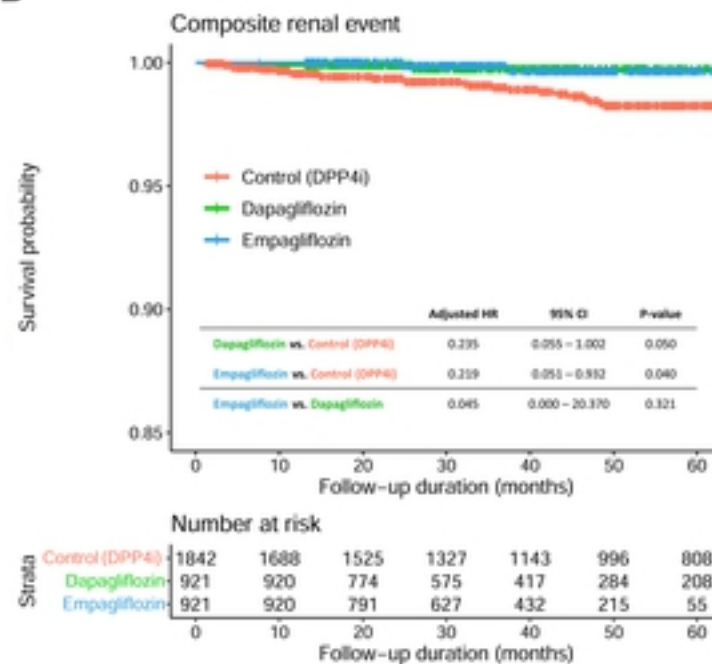

C

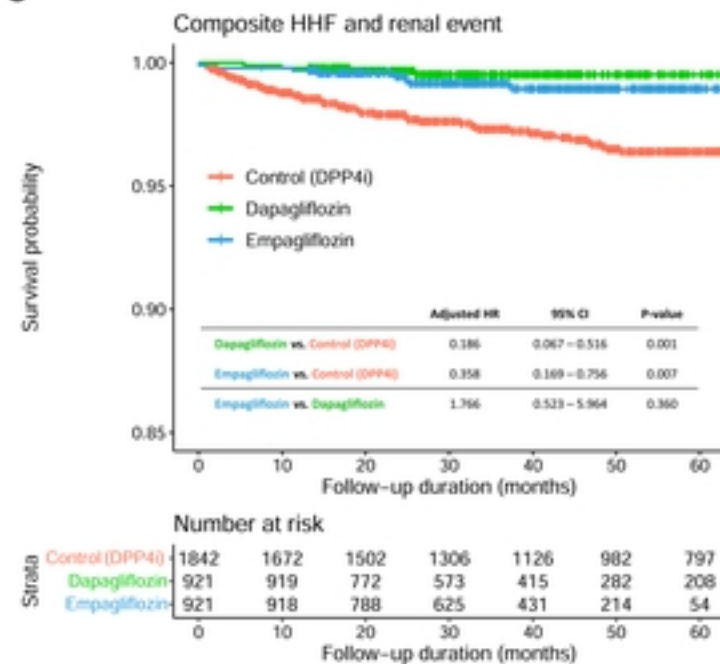

Figure 3

**Figure 4**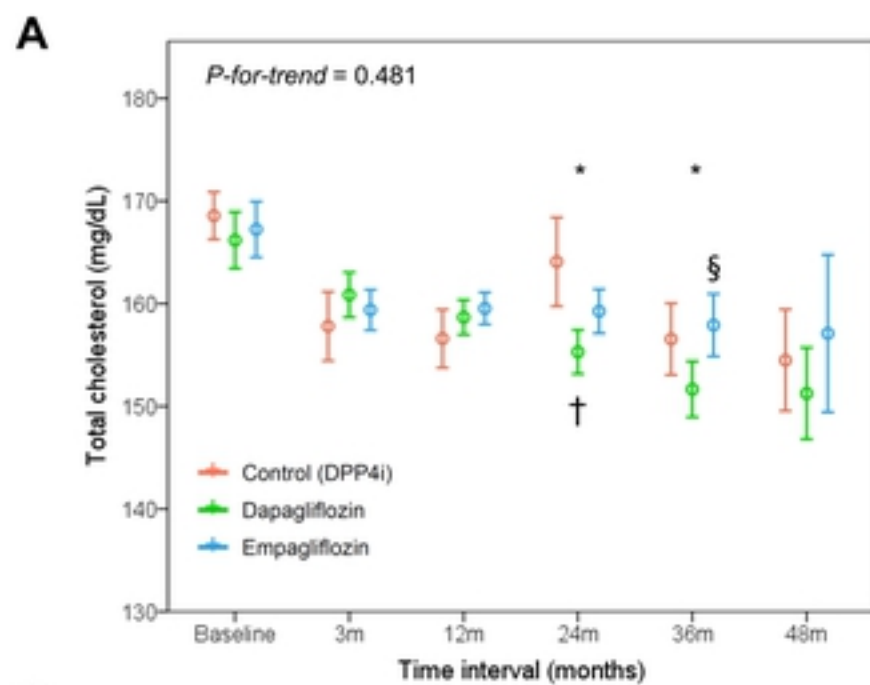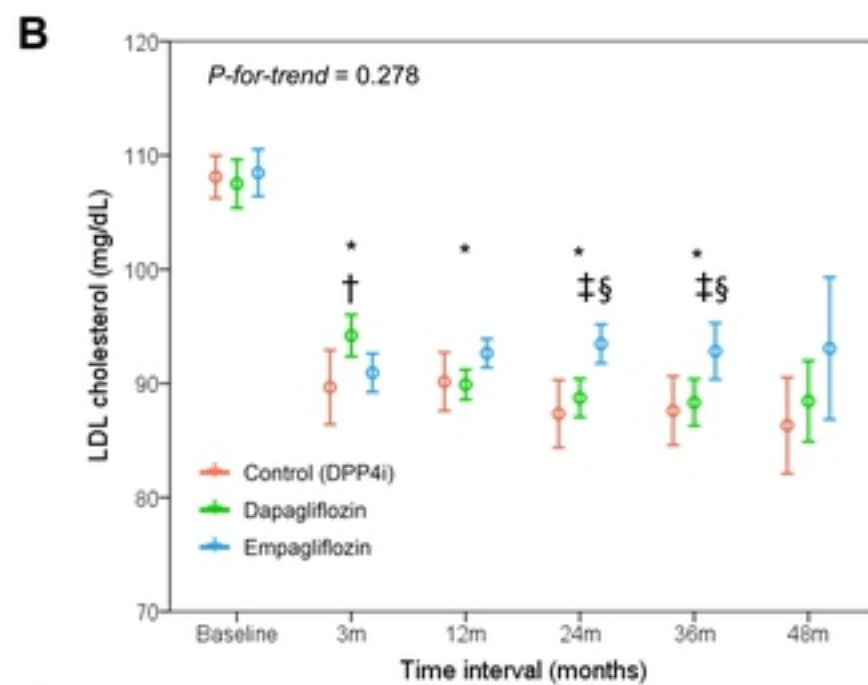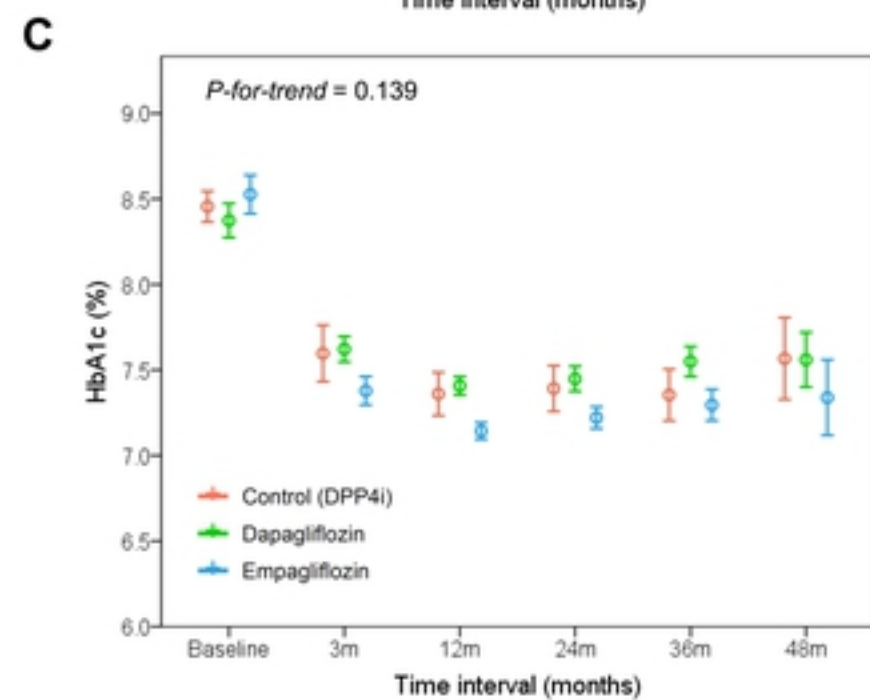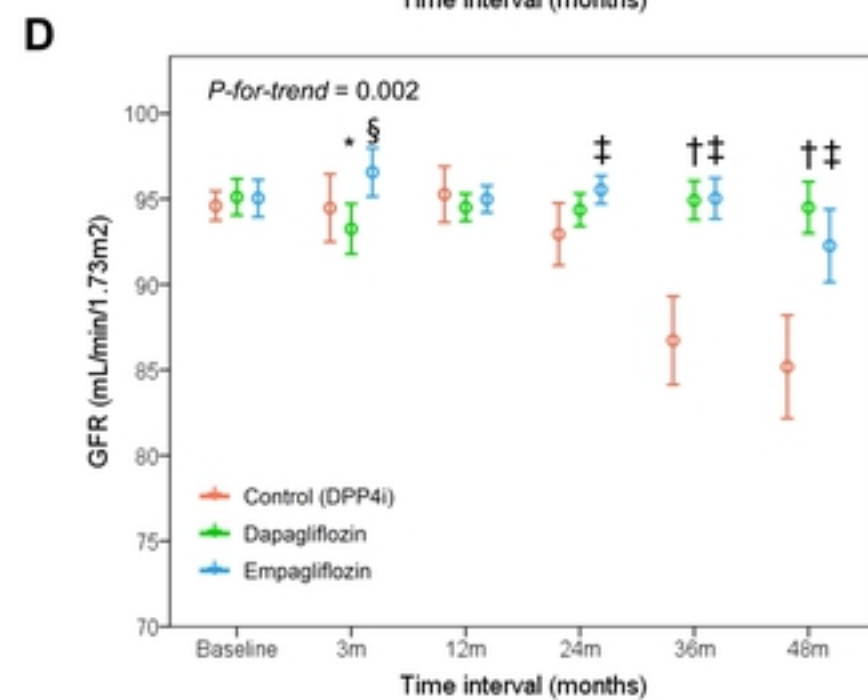

\* Overall *P* < 0.05

† *P* < 0.05 (Dapagliflozin vs. Control)

‡ *P* < 0.05 (Empagliflozin vs. Control)

§ *P* < 0.05 (Dapagliflozin vs. Empagliflozin)

**Figure 4**
